# Supplementary material
Source: PubMed Central journal article supplement (PMC6052215)
Supplement: supp_RA117.001562_134815_2_supp_140458_p8x1q9.pdf [file supp_RA117.001562_134815_2_supp_140458_p8x1q9.pdf]

## Supplementary information.

**Table S1.** Structures of adenosine analogues utilized in this study.

| Compound name                  | Structure                                                                            |
|--------------------------------|--------------------------------------------------------------------------------------|
| Adenosine                      | 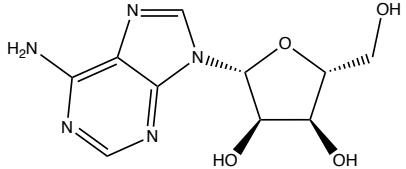   |
| Adenosine monophosphate        |    |
| 8-bromoadenosine               |   |
| 8-bromo-9H-purin-6-amine       |  |
| 8-bromoadenosine acetate       |  |
| 5-O-acetyladenosine            |  |
| 8-bromoadenosine monophosphate |  |

A

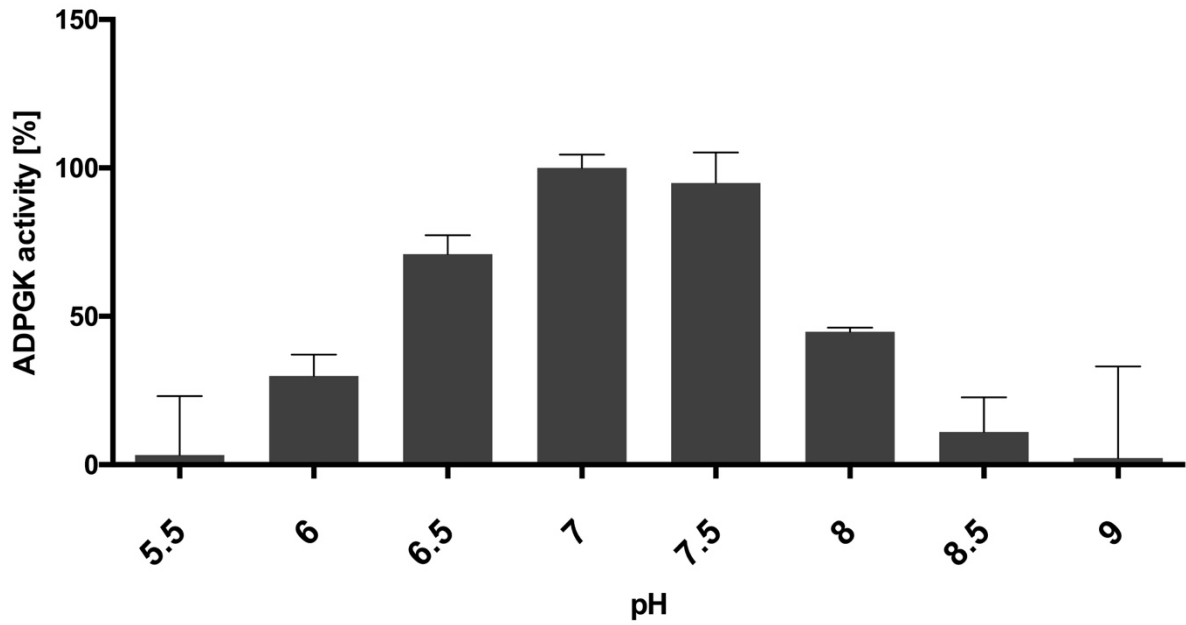

B

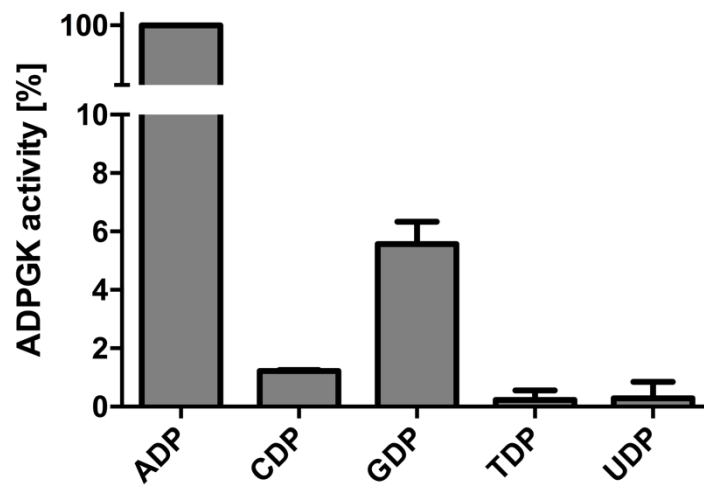

**Figure S1. hADPGK properties** (A) activity pH dependence (B) Substrate specificity towards different dinucleotides.

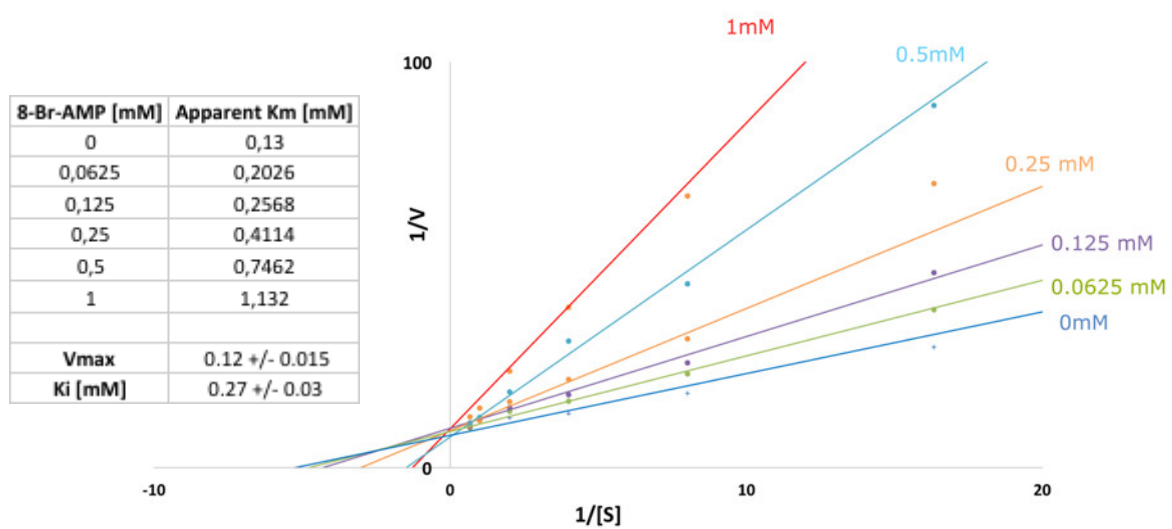

**Figure S2.** Lineweaver-Burk plot of hADPGK kinetics in the presence of 8-Br-AMP.

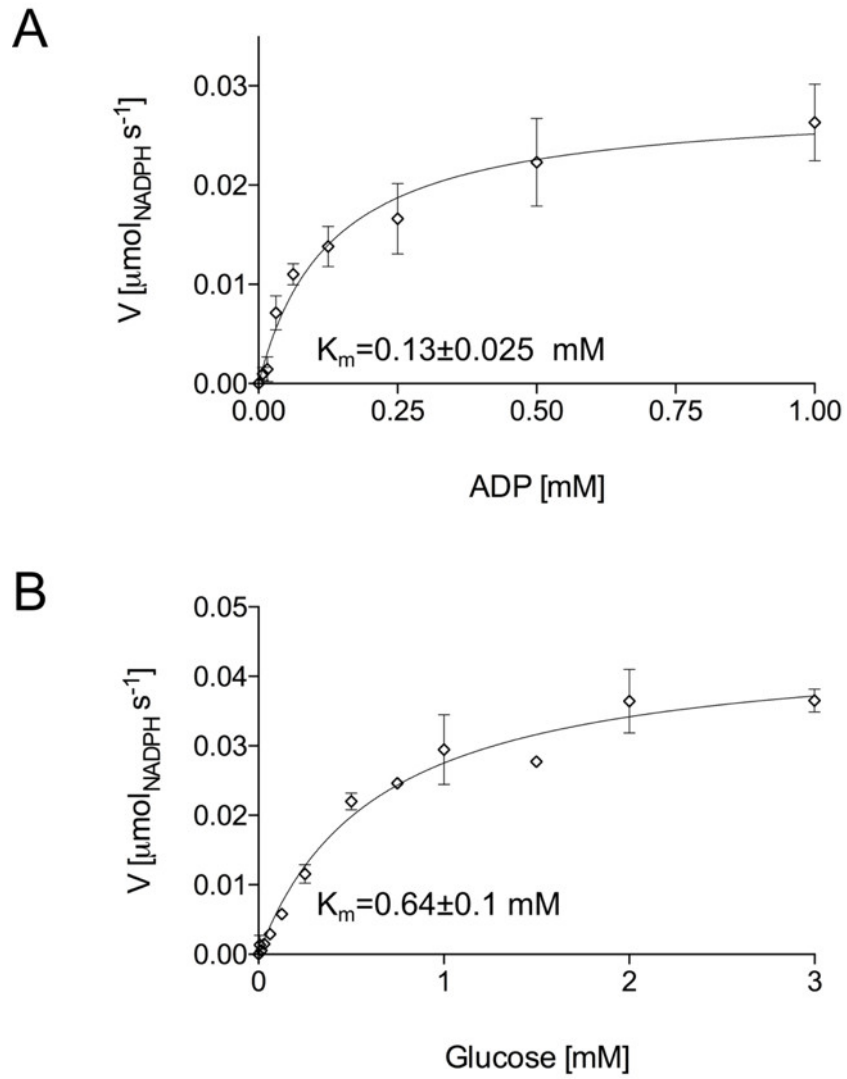

**Figure S3.** Enzymatic characterization of phADPGK.  $K_m$  and  $V_{\text{max}}$  determination for ADP (A) and glucose (B).

A

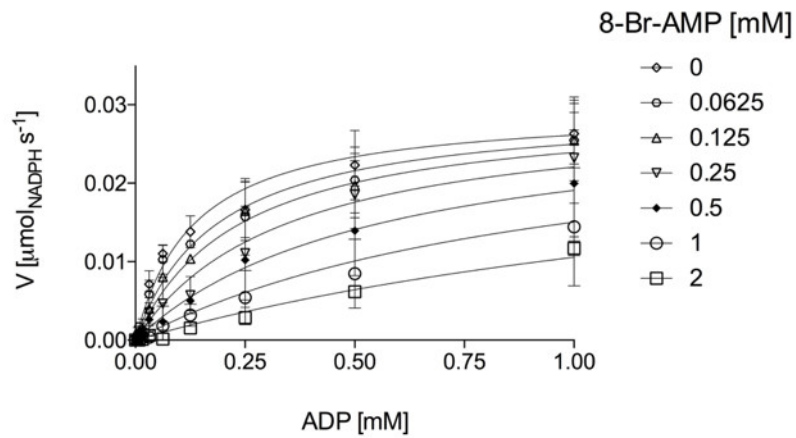

| 8-Br-AMP [mM]  | Apparent Km [mM] |
|----------------|------------------|
| 0              | 0,1292           |
| 0,0625         | 0,1502           |
| 0,125          | 0,2213           |
| 0,25           | 0,5204           |
| 0,5            | 0,5986           |
| 1              | 1,389            |
| 2              | ~ 28,95          |
| <b>Vmax</b>    | 0.031 +/- 0.003  |
| <b>Ki [mM]</b> | 0.16 +/- 0.017   |

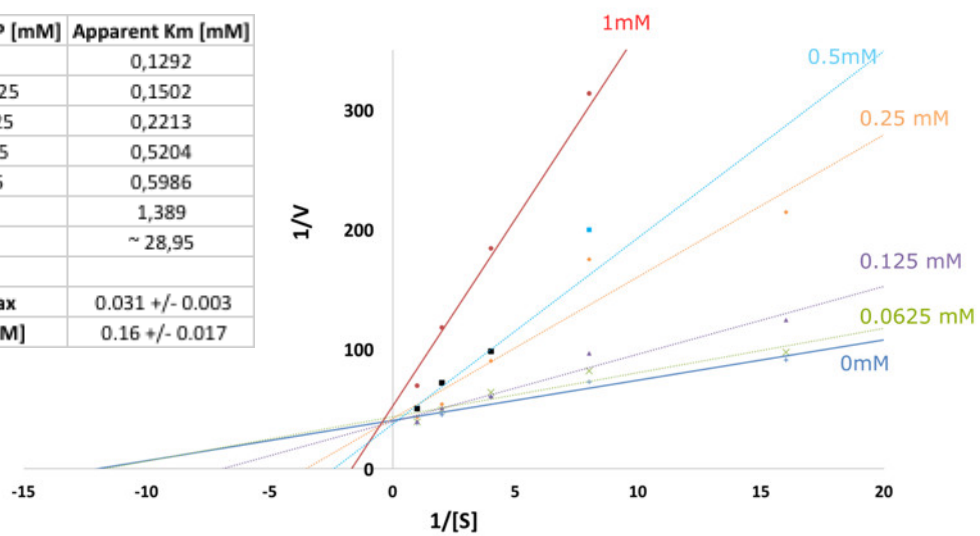

**Figure S4.** A. Inhibition of phADPGK by 8-Br-AMP. B. Lineweaver-Burk plot of phADPGK kinetics in the presence of 8-Br-AMP.

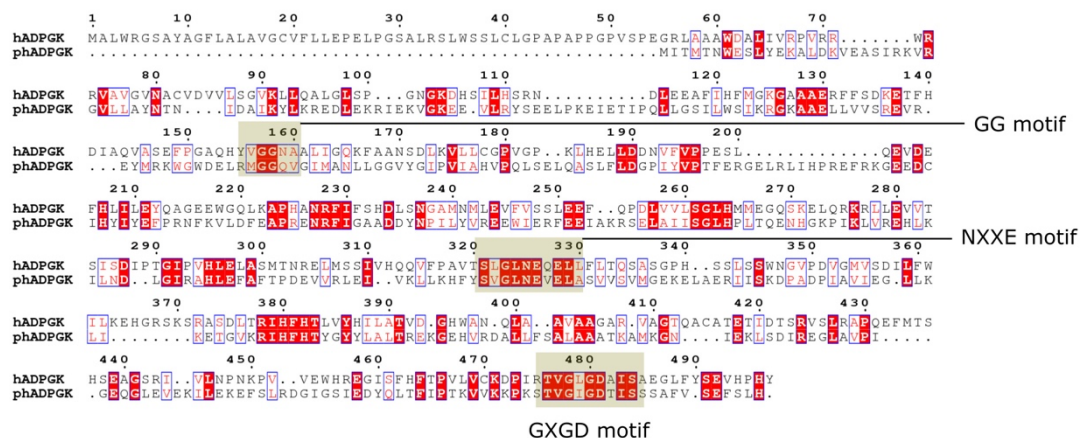

**Figure S5.** Sequence alignment of human and archaeal ADPGK. Highly conserved substrate binding motifs are highlighted. Overall sequence identity is 25%.

A

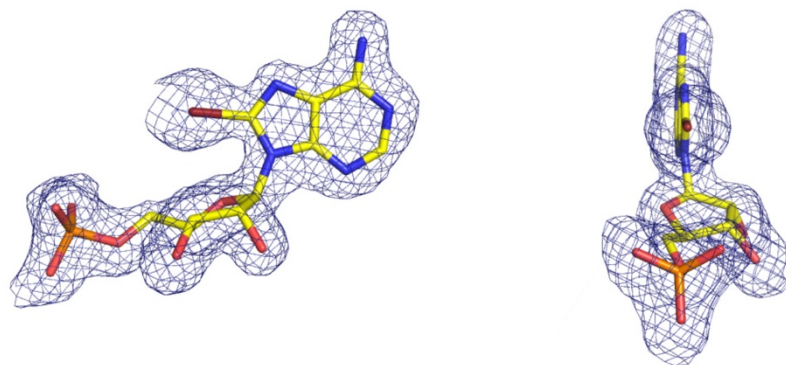

B

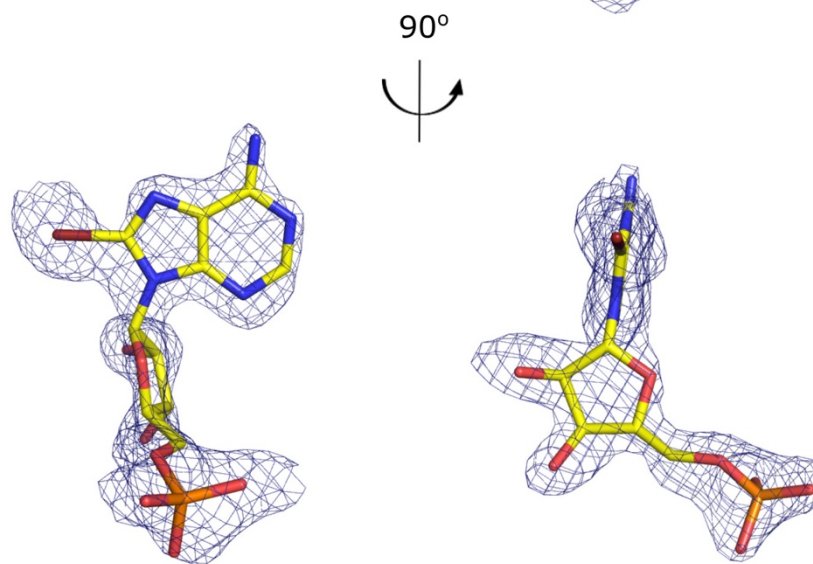

**Figure S6.** Simulated annealing  $F_o-F_c$  composite omit maps ( $3\sigma$ ) calculated for 8-Br-AMP within the active site (A) and additional 8-Br-AMP molecule (B).

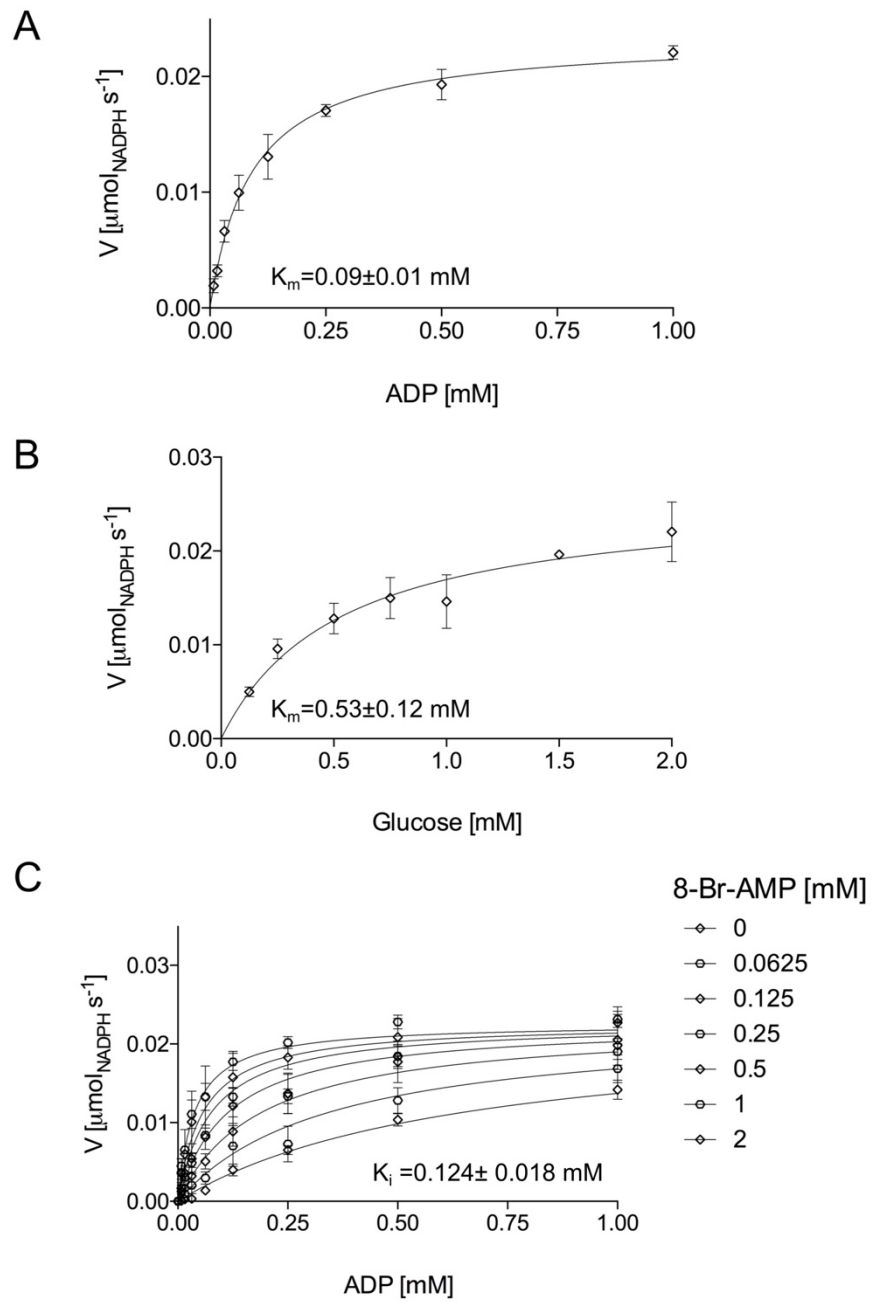

**Figure S7.** Enzymatic characterization of phADPGK F272A.  $K_m$  and  $V_{\text{max}}$  determination for ADP (A) and glucose (B). Inhibition of phADPGK F272A by 8-Br-AMP.



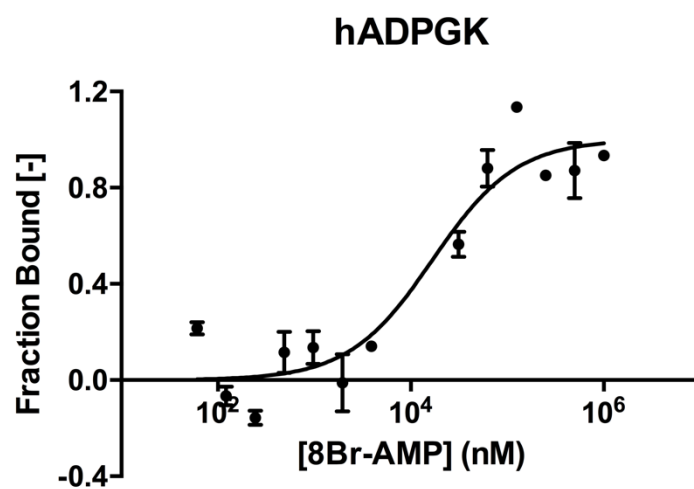

**Figure S8.** Binding of 8-Br-AMP to hADPGK analyzed by Microscale Thermophoresis.

$K_d=16.55 \pm 4.78 \mu\text{M}$

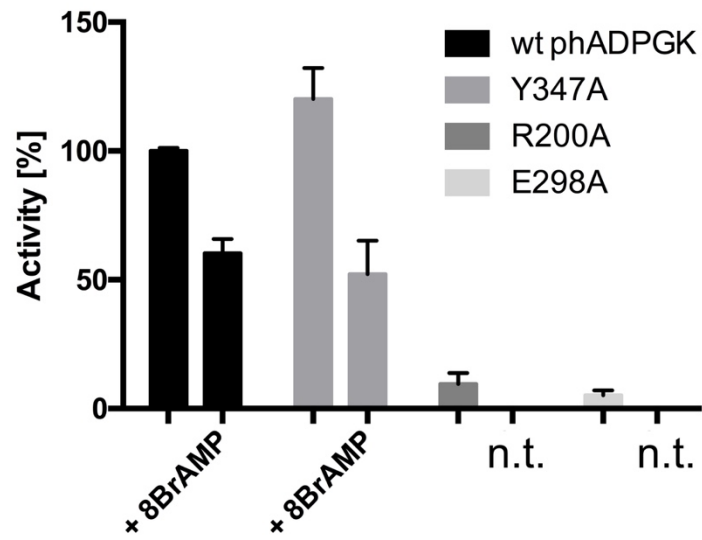

**Figure S9. Effect of amino acid substitutions on the phADPGK activity.** The substitution of Tyr347 for alanine did not cause any significant changes either in the protein activity or inhibition by 8-Br-AMP (1mM), however the substitutions of Arg200 and Glu298 led to inactivation of phADPGK (n.t. – not tested).

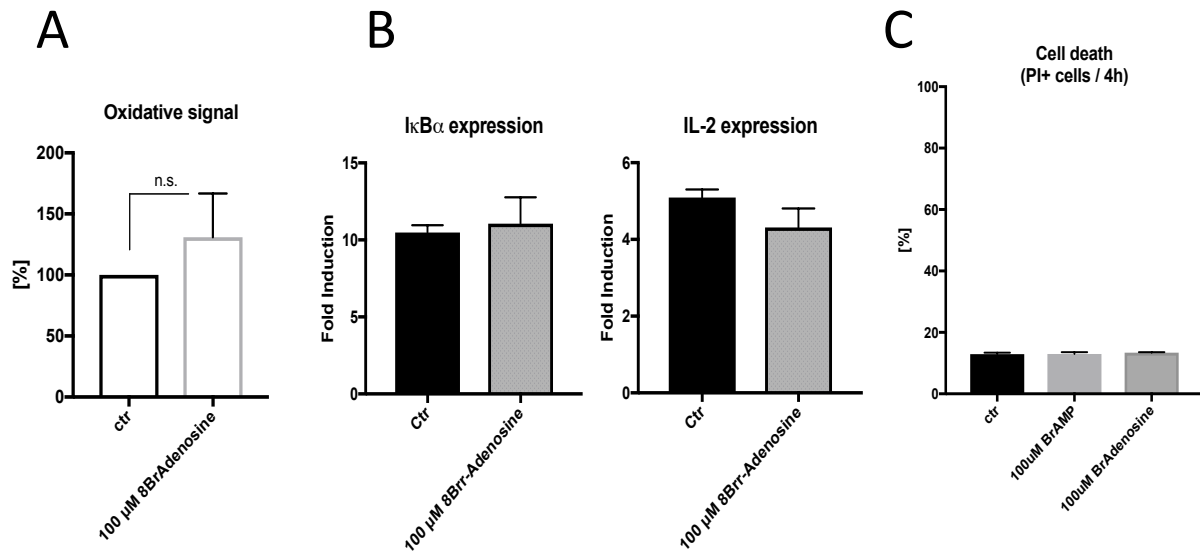

**Figure S10. 8-Br-adenosine does not inhibit T cell activation-induced ROS generation and subsequent NF-κB-dependent gene expression.** (A), Jurkat T cells stained with H<sub>2</sub>DCF-DA and 30 min pre-treated with 100 μM of 8-Br-adenosine were activated by PMA treatment (1 h) and the ‘oxidative signal’ was measured by FACS (mean values +/- SD). Cumulative results of three independent technically triplicated experiments are shown (mean values +/- SD). Statistical significance was calculated by single sample t test (ctr set up to 100%). (B), 8-Br-adenosine-pre-treated Jurkat T cells (30 min) were activated by PMA/ionomycin treatment for 1 h. Next, IL-2 and IκBα gene expression was assayed by RT-PCR (mean values +/- SD). (C), Jurkat T cells were treated with 100 μM of 8-Br-AMP or 8-Br-adenosine for 4 hours and cell death was assayed by FACS measurement of PI+ cells (mean values +/- SD).
